# Supplementary material
Source: Springer Nature journal article supplement (https://www.springermedizin.de/resource/supplementary/12936_2008_698_MOESM8_ESM.pdf/9548026)
Supplement: MOESM8 [file 9548026]

|                 | <i>Mixture<br/>Detection<br/>X allele</i> | <i>Mixture<br/>Detection<br/>Y allele</i> | <i>Reported<br/>Performance</i> |
|-----------------|-------------------------------------------|-------------------------------------------|---------------------------------|
| Pf_01_000130573 | 5:1                                       | 20:1                                      | 5:1                             |
| Pf_01_000539044 | 10:1                                      | 20:1                                      | 10:1                            |
| Pf_02_000842803 | 20:1                                      | 5:1                                       | 5:1                             |
| Pf_04_000282592 | 10:1                                      | 5:1                                       | 5:1                             |
| Pf_05_000931601 | 10:1                                      | 10:1                                      | 10:1                            |
| Pf_06_000145472 | 10:1                                      | 10:1                                      | 10:1                            |
| Pf_06_000937750 | 20:1                                      | 10:1                                      | 10:1                            |
| Pf_07_000277104 | 20:1                                      | 20:1                                      | 20:1                            |
| Pf_07_000490877 | 20:1                                      | 20:1                                      | 20:1                            |
| Pf_07_000545046 | 20:1                                      | 20:1                                      | 20:1                            |
| Pf_07_000657939 | 20:1                                      | 5:1                                       | 5:1                             |
| Pf_07_000671839 | 10:1                                      | 20:1                                      | 10:1                            |
| Pf_07_000683772 | 10:1                                      | 10:1                                      | 10:1                            |
| Pf_07_000792356 | 10:1                                      | 20:1                                      | 10:1                            |
| Pf_07_001415182 | 10:1                                      | 20:1                                      | 10:1                            |
| Pf_08_000613716 | 10:1                                      | 10:1                                      | 10:1                            |
| Pf_09_000634010 | 10:1                                      | 20:1                                      | 10:1                            |
| Pf_10_000082376 | 20:1                                      | 10:1                                      | 10:1                            |
| Pf_10_001403751 | 5:1                                       | 20:1                                      | 20:1                            |
| Pf_11_000117114 | 10:1                                      | 20:1                                      | 10:1                            |
| Pf_11_000406215 | 20:1                                      | 20:1                                      | 20:1                            |
| Pf_13_000158614 | 10:1                                      | 20:1                                      | 10:1                            |
| Pf_13_001429265 | 10:1                                      | 20:1                                      | 10:1                            |
| Pf_14_000755729 | 10:1                                      | 20:1                                      | 10:1                            |
